# Supplementary material for: One-step facile fabrication of sea urchin-like zirconium oxide for efficient phosphate sequestration
Source: Royal Society of Chemistry journal article supplement (doi:10.1039/c5ra12329a), 2015-01-01
Supplement: c5ra12329a1.pdf [file c5ra12329a1.pdf]

## **One-step facile fabrication of the sea urchin-like zirconium oxide for efficient phosphate sequestration**

Sufeng Wang<sup>a</sup>, Mengxuan Ma<sup>a</sup>, Wencang Man<sup>a</sup>, Qingrui Zhang<sup>a\*</sup>, Xiaolong Niu<sup>a</sup>, Guiqing Sun<sup>b</sup>, Wen Zhang<sup>a</sup> and Tifeng Jiao<sup>a\*</sup>

<sup>a</sup> Hebei Key Laboratory of Applied Chemistry, School of Environmental and Chemical Engineering, Yanshan University, Qinhuangdao 066004, PR China

<sup>b</sup> Hebei Ocean & Fisheries Science Research Institute, Qinhuangdao 066200, PR China

\*Corresponding author: Qingrui Zhang and Tifeng Jiao

E-mail: [zhangqr@ysu.edu.cn](mailto:zhangqr@ysu.edu.cn)/ [tfjiao@ysu.edu.cn](mailto:tfjiao@ysu.edu.cn)

Tel: +86-335-8387741, Fax: +86-335-8061569



**Figure S1** lower magnification images of the sea urchin-like zirconium oxide

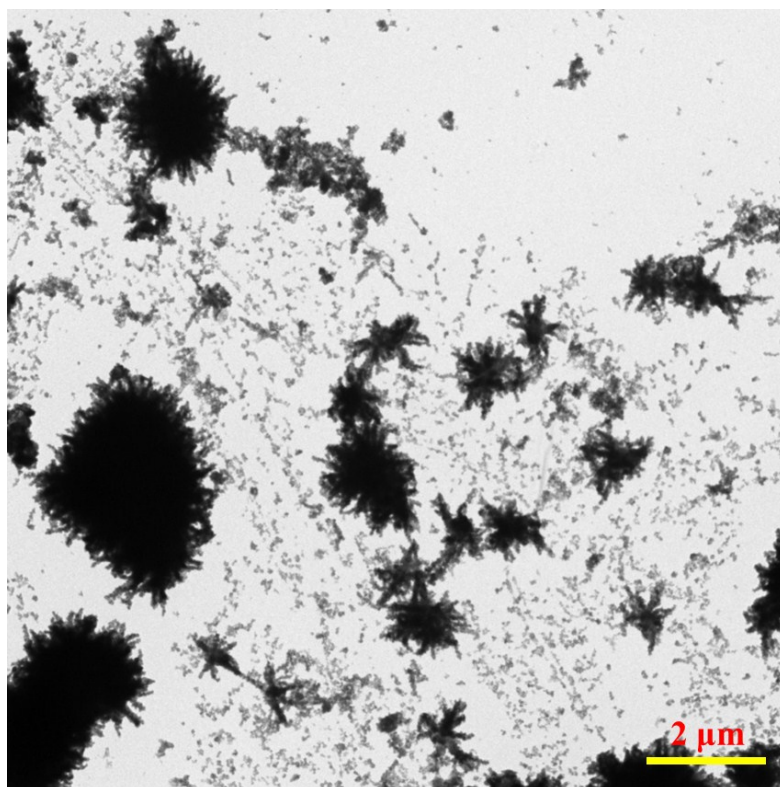

Fig. S2 XRD pattern of the resulting Ur-Zr and the Standard tetragonal ZrO<sub>2</sub>

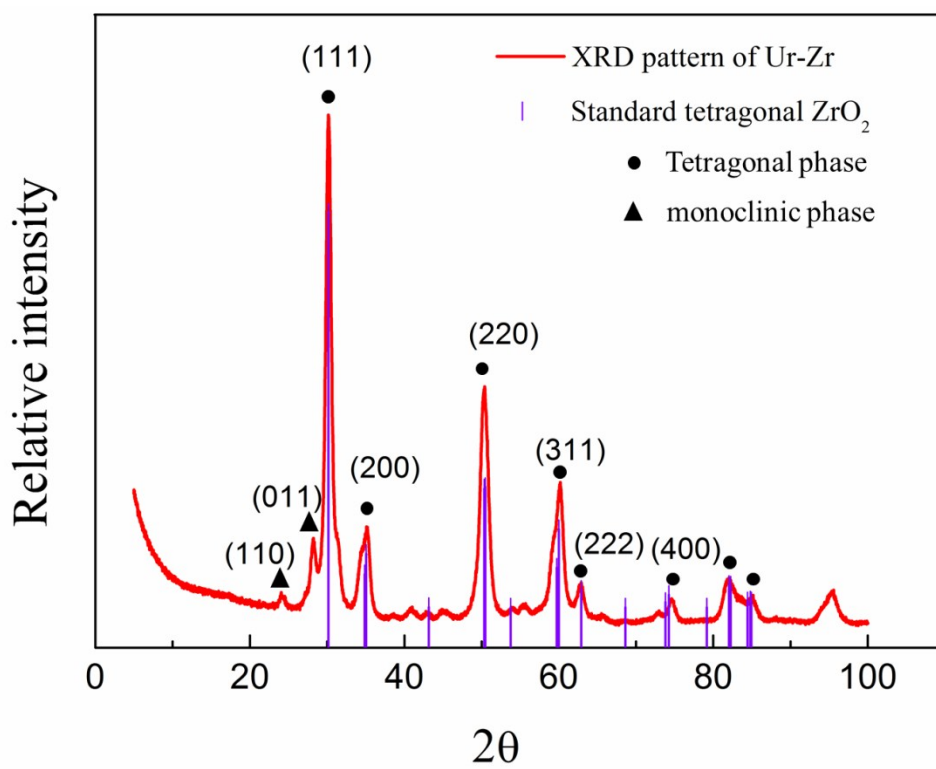

**Table S1** Salient properties from N<sub>2</sub> adsorption at 77 K of as-prepared sea urchin-like zirconium oxide

| Designation                          | Nanostructured zirconium oxide |
|--------------------------------------|--------------------------------|
| morphology                           | Sea urchin similar structure   |
| BET surface area (m <sup>2</sup> /g) | 64.5                           |
| Average pore diameter (nm)           | 12.6                           |
| Pore volume (cm <sup>3</sup> /g)     | 0.142                          |

**Table S2** The distribution ratio  $K_d$  (L/g) for three competing anions.

| Competing Cations (M)         | Adsorbent | $K_d$ (L/g) at different competing ions in solution |          |         |         |          |
|-------------------------------|-----------|-----------------------------------------------------|----------|---------|---------|----------|
|                               |           | 0                                                   | 200 mg/L | 400mg/L | 600mg/L | 1000mg/L |
| SO <sub>4</sub> <sup>2-</sup> | Ur-Zr     | 29.2                                                | 22.5     | 23.4    | 18.8    | 20.1     |
|                               | FerriX™   | 3.78                                                | 1.10     | 0.79    | 0.78    | 0.74     |
| Cl <sup>-</sup>               | Ur-Zr     | 29.2                                                | 20.7     | 21.4    | 21.7    | 20.2     |
|                               | FerriX™   | 3.78                                                | 1.01     | 0.92    | 0.88    | 0.95     |
| NO <sub>3</sub> <sup>-</sup>  | Ur-Zr     | 29.2                                                | 19.9     | 20.1    | 20.9    | 20.6     |
|                               | FerriX™   | 3.78                                                | 1.00     | 0.87    | 0.88    | 0.78     |

**Table S3** the parameters of kinetic model for the adsorption of phosphate onto Ur-Zr.

| Materials | Pseudo-first-order model |            |       | Pseudo-second-order model |            |       | Intraparticle-diffusion model      |       |
|-----------|--------------------------|------------|-------|---------------------------|------------|-------|------------------------------------|-------|
|           | $q_e$ (mg/g)             | $k$ (/min) | $R^2$ | $q_e$ (mg/g)              | $k$ (/min) | $R^2$ | $k_p$ (mg/(g min <sup>1/2</sup> )) | $R^2$ |
| Ur-Zr     | 17.01                    | 0.0124     | 0.987 | 14.2                      | 0.00134    | 0.958 | 1.078                              | 0.990 |

**Table S4** the parameters of sorption isotherm models for phosphate uptake onto Ur-Zr.

| Temperature | Model      | Parameter1                                      | Parameter 2                       | Parameter 3 | R <sup>2</sup> |
|-------------|------------|-------------------------------------------------|-----------------------------------|-------------|----------------|
| 25°C        | Langmuir   | $k_L=0.1207L \cdot mg^{-1}$                     | $Q_{max}=44.59203mg \cdot g^{-1}$ |             | 0.78607        |
|             | Freundlich | $k_F=12.42574mg^{(1-n)} \cdot L^n \cdot g^{-1}$ |                                   | $n=0.29373$ | 0.96281        |
|             | Temkin     | $b=515.02377J \cdot g \cdot mg^{-1}$            | $A=30.36302L \cdot mg^{-1}$       |             | 0.80258        |
| 45°C        | Langmuir   | $k_L=0.09249L \cdot mg^{-1}$                    | $Q_{max}=57.8409mg \cdot g^{-1}$  |             | 0.86459        |
|             | Freundlich | $k_F=12.4323mg^{(1-n)} \cdot L^n \cdot g^{-1}$  |                                   | $n=0.35212$ | 0.96562        |
|             | Temkin     | $b=442.35866J \cdot g \cdot mg^{-1}$            | $A=30.36302L \cdot mg^{-1}$       |             | 0.76314        |
| 65°C        | Langmuir   | $k_L=0.0723L \cdot mg^{-1}$                     | $Q_{max}=74.858mg \cdot g^{-1}$   |             | 0.89933        |
|             | Freundlich | $k_F=11.72062mg^{(1-n)} \cdot L^n \cdot g^{-1}$ |                                   | $n=0.4277$  | 0.96494        |
|             | Temkin     | $b=346.3922J \cdot g \cdot mg^{-1}$             | $A=8.48491L \cdot mg^{-1}$        |             | 0.74212        |
